# Supplementary material
Source: PubMed Central journal article supplement (PMC4764457)
Supplement: NIHMS737000-supplement-Supplemental_Digital_Content_to_Be_Published.pdf [file NIHMS737000-supplement-Supplemental_Digital_Content_to_Be_Published.pdf]

## SDC, Figure 1

|   |                                                                                                  |
|---|--------------------------------------------------------------------------------------------------|
| 0 | Clear                                                                                            |
| 1 | Minimal superficial opacity:<br>pupil margin and iris vessels readily visible through the cornea |
| 2 | Minimal stromal opacity: pupil margin and iris vessels visible                                   |
| 3 | Moderate stromal opacity: only pupil margin visible                                              |
| 4 | Intense stromal opacity: only a portion of pupil margin visible                                  |
| 5 | Maximum stromal opacity: anterior chamber not visible                                            |

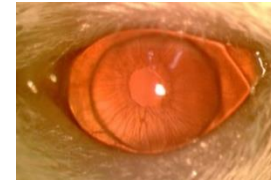

Accepted

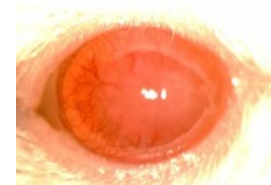

Rejected

**SDC Fig 1-** Transplants were examined weekly with a slit-lamp microscope and grafts with opacity scores  $>2$  after two weeks, which remained above 2 for at least two consecutive weeks, were considered as rejected.
