# Supplementary material
Source: PubMed Central journal article supplement (PMC4764457)
Supplement: NIHMS737000-supplement-Supplemental_Digital_Content_to_Be_Published_2.pdf [file NIHMS737000-supplement-Supplemental_Digital_Content_to_Be_Published_2.pdf]

## SDC Figure 2

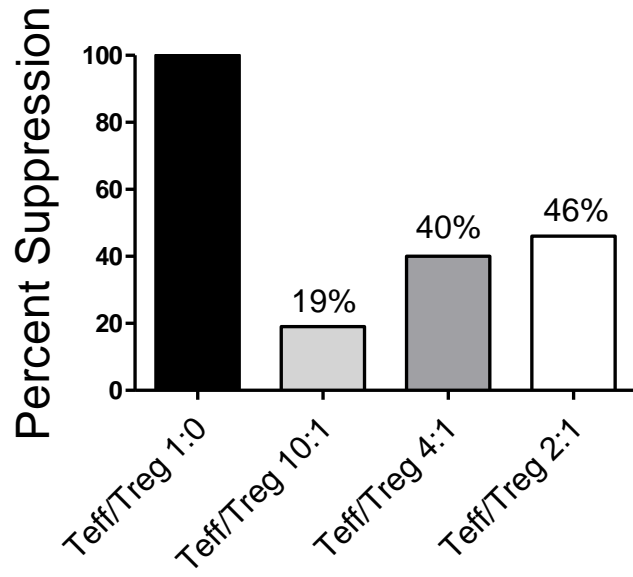

**SDC Fig 2-** Treg suppression assay with different Teff to Treg ratios. At the ratio of 2:1 (100,000 Teff and 50,000 Tregs in the presence of 100,000 APCs) 46% suppression of the T cell proliferation is observed.
