# Supplementary material
Source: PubMed Central journal article supplement (PMC4764457)
Supplement: NIHMS737000-supplement-Supplemental_Digital_Content_to_Be_Published_3.pdf [file NIHMS737000-supplement-Supplemental_Digital_Content_to_Be_Published_3.pdf]

## SDC Figure 3

A)

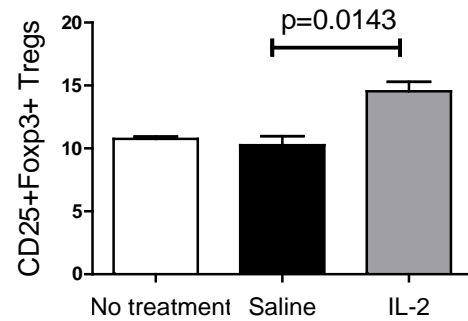

B)

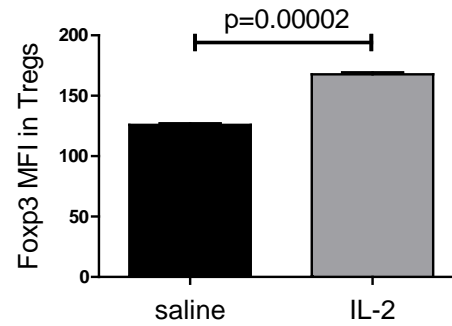

**SDC Fig 3-** Three intraperitoneal injections of IL-2 (1 $\mu$ g/25g mouse body weight) once/day in naïve BALB/c mice significantly increased frequencies of CD4+CD25+Foxp3+Tregs (A) and their Foxp3 expression (B), as measured in the cervical and submandibular lymph nodes.
